# Supplementary material for: Inferring causal genomic alterations in breast cancer using gene expression data
Source: Springer Nature journal article supplement (doi:10.1186/1752-0509-5-121), 2011-08-01

A

Fold Enrichment

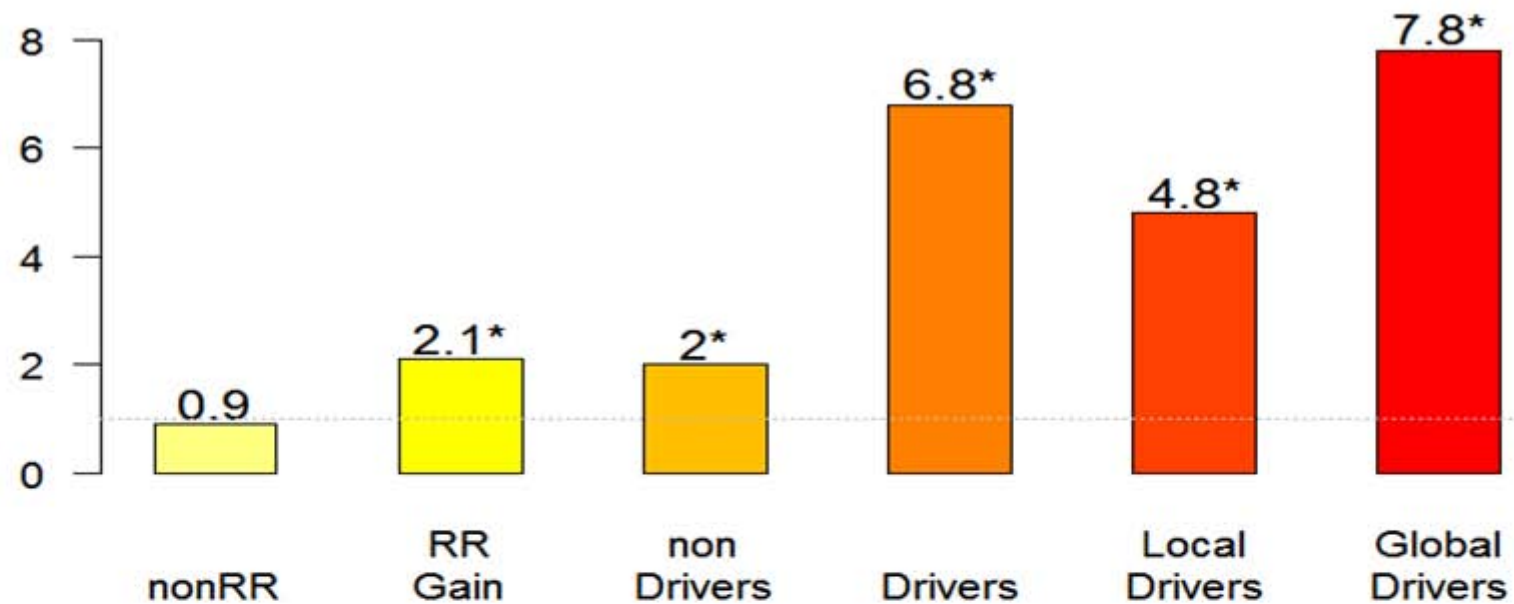

B

Fold Enrichment

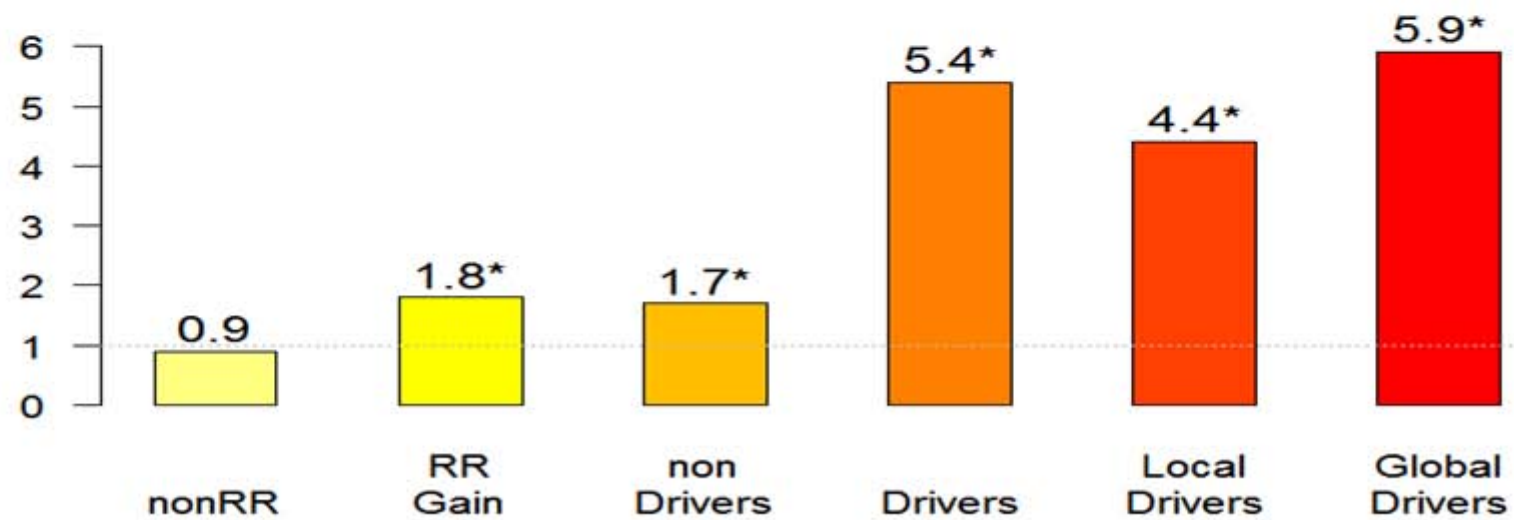

Supplement: 12918_2011_725_MOESM7_ESM.pdf [file 12918_2011_725_MOESM7_ESM.pdf]
